# Supplementary material for: Washing Bottom Sediment for The Removal of Arsenic from Contaminated Italian Coast
Source: MDPI journal article supplement (doi:10.3390/pr11030902), 2023-03-16
Supplement: s1 [file s1]

## Supplementary material

# Washing Bottom Sediment For The Removal Of Arsenic From Contaminated Italian Coast

Marica Muscetta<sup>1,\*</sup>, Francesco Bianco<sup>2</sup>, Gennaro Trancone<sup>3</sup>, Marco Race<sup>2</sup>, Antonietta Siciliano<sup>4</sup>, Fabio D'Agostino<sup>5</sup>, Mario Sprovieri<sup>5</sup>, Laura Clarizia<sup>1,\*</sup>

1 Department of Chemical, Materials and Production Engineering (DICMaPI), University of Naples Federico II, Piazzale V. Tecchio 80, 80125 Naples, Italy

2 Department of Civil and Mechanical Engineering, University of Cassino and Southern Lazio, Via Di Biasio 43, 03043 Cassino, Italy

3 Department of Civil, Architectural and Environmental Engineering, University of Napoli Federico II, Via Claudio 21, 80125 Napoli, Italy

4 Department of Biology, University of Naples Federico II, Via Cintia 4, Complesso Universitario di Monte Sant'Angelo, I-80126 Naples, Italy

5 Institute of Anthropic Impacts and Sustainability in the Marine Environment (IAS), National Research Council of Italy (CNR), 91021, Torretta Granitola, Italy

\*Correspondence: marica.muscetta@unina.it (M.M.), laura.clarizia2@unina.it (L.C.)

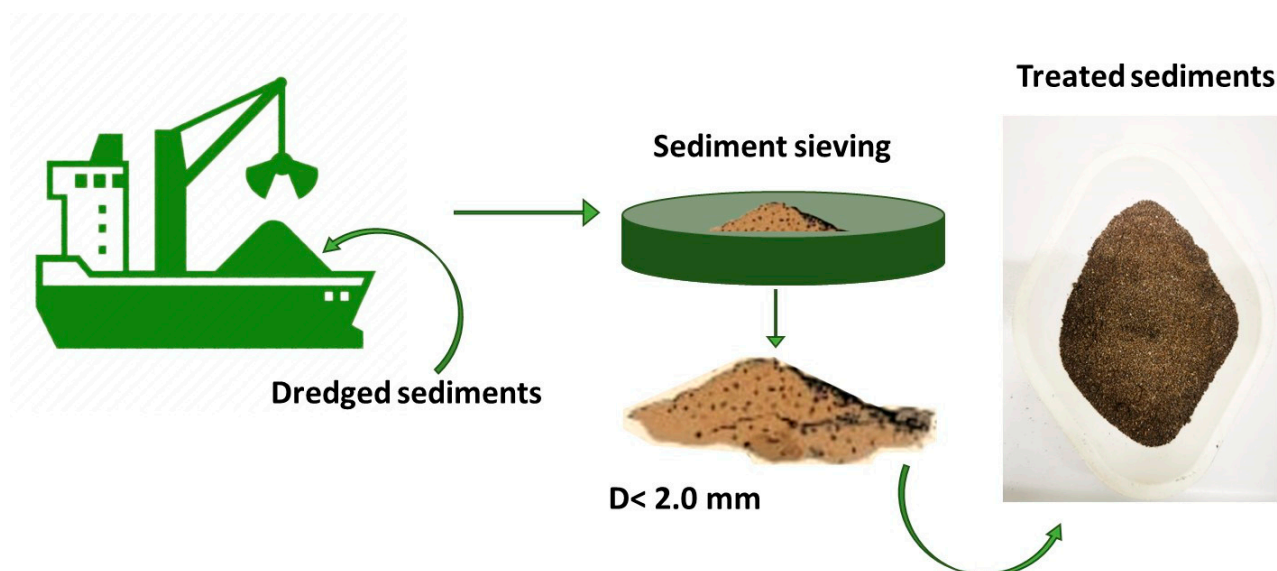

Figure S1. Overview of operating phases involved before the soil washing experiments.
